# Supplementary material for: The Impact of 52-Week Single Inhaler Device Triple Therapy versus Dual Therapy on the Mortality of COPD Patients: A Systematic Review and Meta-Analysis of Randomized Controlled Trials
Source: MDPI journal article supplement (doi:10.3390/life12020173), 2022-01-25
Supplement: s1 [file s1]

## Supplementary Table S1. Search strategy

Search strategy in **Pubmed** (Search date: 20210706)

| PICO      | Search | Query                                         | Items found | Time     |
|-----------|--------|-----------------------------------------------|-------------|----------|
|           | 39     | #33 AND #38                                   | 380         | 03:56:31 |
|           | 38     | #34 OR #35 OR #36 OR #37                      | 1,480,696   | 03:56:25 |
|           | 37     | random*                                       | 1,475,518   | 03:56:19 |
|           | 36     | RCT                                           | 27,207      | 03:56:14 |
|           | 35     | Randomized Controlled Trial*                  | 793,860     | 03:56:10 |
|           | 34     | Randomized Controlled Trial [MeSH term]       | 712,927     | 03:56:04 |
| <b>PI</b> | 33     | #4 AND #32                                    | 1,119       | 03:55:58 |
| <b>I</b>  | 32     | #7 OR #31                                     | 91,056      | 03:55:54 |
|           | 31     | #15 AND #23 AND #30                           | 1,031       | 03:55:48 |
|           | 30     | #24 OR #25 OR #26 OR #27 OR #28 OR #29        | 36,219      | 03:55:42 |
|           | 29     | Ciclesonide                                   | 424         | 03:55:37 |
|           | 28     | Budesonide                                    | 6,637       | 03:55:31 |
|           | 27     | Fluticasone                                   | 4,817       | 03:55:26 |
|           | 26     | Beclomethasone                                | 3,967       | 03:55:22 |
|           | 25     | inhaled corticosteroid                        | 17,602      | 03:55:17 |
|           | 24     | ICS                                           | 13,407      | 03:55:12 |
|           | 23     | #16 OR #17 OR #18 OR #19 OR #20 OR #21 OR #22 | 8,529       | 03:55:08 |
|           | 22     | Indacaterol                                   | 529         | 03:55:02 |
|           | 21     | Olodaterol                                    | 236         | 03:54:56 |
|           | 20     | Vilanterol                                    | 437         | 03:54:49 |
|           | 19     | Formoterol                                    | 2,695       | 03:54:43 |
|           | 18     | Salmeterol                                    | 3,070       | 03:54:37 |
|           | 17     | long-acting beta agonist                      | 4,080       | 03:54:30 |
|           | 16     | LABA                                          | 2,146       | 03:54:25 |
|           | 15     | #8 OR #9 OR #10 OR #11 OR #12 OR #13 OR #14   | 6,877       | 03:54:17 |
|           | 14     | Glycopyrrolate                                | 1           | 03:54:11 |
|           | 13     | Glycopyrronium                                | 1,736       | 03:54:04 |
|           | 12     | Umeclidinium                                  | 284         | 03:53:57 |

|          |    |                                                    |        |          |
|----------|----|----------------------------------------------------|--------|----------|
|          | 11 | Acclidinium                                        | 236    | 03:53:50 |
|          | 10 | Tiotropium                                         | 1,901  | 03:53:42 |
|          | 9  | long-acting muscarinic receptor antagonist         | 1,062  | 03:53:32 |
|          | 8  | LAMA                                               | 3,251  | 03:53:25 |
|          | 7  | #5 OR #6                                           | 90,315 | 03:53:17 |
|          | 6  | Triple-combination                                 | 1,736  | 03:53:09 |
|          | 5  | Triple                                             | 90,315 | 03:53:02 |
| <b>P</b> | 4  | #1 OR #2 OR #3                                     | 94,358 | 03:52:54 |
|          | 3  | Pulmonary Disease, Chronic Obstructive [MeSH term] | 86,939 | 03:52:46 |
|          | 2  | Chronic Obstructive Pulmonary Disease              | 86,939 | 03:52:39 |
|          | 1  | COPD                                               | 94,358 | 03:50:37 |

Search strategy in **Embase** (Search date: 20210706)

|           | No. | Query                                           | Results |
|-----------|-----|-------------------------------------------------|---------|
| <b>PI</b> | #37 | #4 AND #32 AND #36                              | 1166    |
| <b>I</b>  | #36 | #33 OR #34 OR #35                               | 1924229 |
|           | #35 | random*                                         | 1912561 |
|           | #34 | rct                                             | 47884   |
|           | #33 | 'randomized controlled trial'/exp [Emtree term] | 667168  |
|           | #32 | #7 OR #31                                       | 136606  |
|           | #31 | #15 AND #23 AND #30                             | 4025    |
|           | #30 | #24 OR #25 OR #26 OR #27 OR #28 OR #29          | 79908   |
|           | #29 | ciclesonide                                     | 1750    |
|           | #28 | budesonide                                      | 24435   |
|           | #27 | fluticasone                                     | 19461   |
|           | #26 | beclomethasone                                  | 9777    |
|           | #25 | inhaled AND corticosteroid                      | 19535   |
|           | #24 | ics                                             | 31498   |
|           | #23 | #16 OR #17 OR #18 OR #19 OR #20 OR #21 OR #22   | 22300   |
|           | #22 | indacaterol                                     | 1910    |
|           | #21 | olodaterol                                      | 790     |
|           | #20 | vilanterol                                      | 1499    |
|           | #19 | formoterol                                      | 9711    |
|           | #18 | salmeterol                                      | 12111   |
|           | #17 | 'long-acting beta agonist'                      | 866     |
|           | #16 | laba                                            | 5011    |
|           | #15 | #8 OR #9 OR #10 OR #11 OR #12 OR #13 OR #14     | 20359   |
|           | #14 | glycopyrrolate                                  | 5       |
|           | #13 | glycopyrronium                                  | 7814    |
|           | #12 | umeclidinium                                    | 1023    |
|           | #11 | aclidinium                                      | 870     |
|           | #10 | tiotropium                                      | 6769    |
|           | #9  | 'long-acting muscarinic receptor antagonist'    | 85      |
|           | #8  | lama                                            | 6892    |
|           | #7  | #5 OR #6                                        | 133306  |
|           | #6  | triple                                          | 133306  |
|           | #5  | 'triple combination'                            | 3076    |
| <b>P</b>  | #4  | #1 OR #2 OR #3                                  | 173676  |
|           | #3  | 'chronic obstructive pulmonary disease'         | 78721   |

|  |    |                                                      |        |
|--|----|------------------------------------------------------|--------|
|  | #2 | copd                                                 | 98972  |
|  | #1 | 'chronic obstructive lung disease'/exp [Emtree term] | 147976 |

Search strategy in Cochrane Library (Search date: 20210706)

| PICO      | Search | Query                                              |
|-----------|--------|----------------------------------------------------|
| <b>P</b>  | #1     | COPD                                               |
|           | #2     | Chronic Obstructive Pulmonary Disease              |
|           | #3     | Pulmonary Disease, Chronic Obstructive [Mesh term] |
|           | #4     | #1 OR #2 OR #3                                     |
| <b>I</b>  | #5     | Triple-combination                                 |
|           | #6     | Triple                                             |
|           | #7     | #5 OR #6                                           |
|           | #8     | LAMA                                               |
|           | #9     | long-acting muscarinic receptor antagonist         |
|           | #10    | Tiotropium                                         |
|           | #11    | Acclidinium                                        |
|           | #12    | Umeclidinium                                       |
|           | #13    | Glycopyrronium                                     |
|           | #14    | Glycopyrrolate                                     |
|           | #15    | #8 OR #9 OR #10 OR #11 OR #12 OR #13 OR #14        |
|           | #16    | LABA                                               |
|           | #17    | long-acting beta agonist                           |
|           | #18    | Salmeterol                                         |
|           | #19    | Formoterol                                         |
|           | #20    | Vilanterol                                         |
|           | #21    | Olodaterol                                         |
|           | #22    | Indacaterol                                        |
|           | #23    | #16 OR #17 OR #18 OR #19 OR #20 OR #21 OR #22      |
|           | #24    | ICS                                                |
|           | #25    | inhaled corticosteroid                             |
|           | #26    | Beclomethasone                                     |
|           | #27    | Fluticasone                                        |
|           | #28    | Budesonide                                         |
|           | #29    | Ciclesonide                                        |
|           | #30    | #24 OR #25 OR #26 OR #27 OR #28 OR #29             |
|           | #31    | #15 AND #23 AND #30                                |
|           | #32    | #7 OR #31                                          |
| <b>PI</b> | #33    | #4 AND #32                                         |

Cochrane Database of Systematic Reviews (CDSR): 222

Cochrane Central Register of Controlled Trials (CENTRAL): 966

Search strategy in **Web of Science Core Collection** (Search date: 2021/07/06)

| <b>PICO</b> | <b>#</b> | <b>Query</b>                                       | <b>Results</b> |
|-------------|----------|----------------------------------------------------|----------------|
|             | #36      | #31 AND #35                                        | 492            |
|             | #35      | #32 OR #33 OR #34                                  | 1,869,344      |
|             | #34      | ALL=(random*)                                      | 1,862,604      |
|             | #33      | ALL=(RCT)                                          | 28,797         |
|             | #32      | ALL=('Randomized Controlled Trial*')               | 446,587        |
| <b>PI</b>   | #31      | #3 AND #30                                         | 1,452          |
|             | #30      | #7 OR (#14 AND #22 AND #29)                        | 11,169         |
|             | #29      | #23 OR #24 OR #25 OR #26 OR #27 OR #28             | 56,153         |
|             | #28      | ALL=(Ciclesonide)                                  | 534            |
|             | #27      | ALL=(Budesonide)                                   | 10,004         |
|             | #26      | ALL=(Fluticasone)                                  | 8,667          |
|             | #25      | ALL=(Beclomethasone)                               | 4,511          |
|             | #24      | ALL=('inhaled corticosteroid')                     | 15,000         |
|             | #23      | ALL=(ICS)                                          | 31,218         |
|             | #22      | #15 OR #16 OR #17 OR #18 OR #19 OR #20 OR #21      | 11,783         |
|             | #21      | ALL=(Indacaterol)                                  | 886            |
|             | #20      | ALL=(Olodaterol)                                   | 394            |
|             | #19      | ALL=(Vilanterol)                                   | 670            |
|             | #18      | ALL=(Formoterol)                                   | 4,004          |
|             | #17      | ALL=(Salmeterol)                                   | 5,344          |
|             | #16      | ALL=('long-acting beta agonist')                   | 4,255          |
|             | #15      | ALL=(LABA)                                         | 2,426          |
|             | #14      | #7 OR #8 OR #9 OR #10 OR #11 OR #12 OR #13         | 14,087         |
|             | #13      | ALL=(Glycopyrrolate)                               | 2              |
|             | #12      | ALL=(Glycopyrronium)                               | 791            |
|             | #11      | ALL=(Umeclidinium)                                 | 426            |
|             | #10      | ALL=(Aclidinium)                                   | 458            |
|             | #9       | ALL=(Tiotropium)                                   | 3,294          |
|             | #8       | ALL=('long-acting muscarinic receptor antagonist') | 264            |
|             | #7       | ALL=(LAMA)                                         | 10,257         |
|             | #6       | #4 OR #5                                           | 178,968        |
|             | #5       | ALL=('Triple-combination')                         | 2,086          |
| <b>I</b>    | #4       | ALL=(Triple)                                       | 178,968        |

|          |    |                                               |        |
|----------|----|-----------------------------------------------|--------|
|          | #3 | #2 OR #1                                      | 93,433 |
|          | #2 | ALL=(COPD)                                    | 70,090 |
| <b>P</b> | #1 | ALL=('Chronic Obstructive Pulmonary Disease') | 61,490 |

Search strategy in **clinicaltrials.gov** (Search date: 2021/07/06)

Keyword:

**Condition or disease:** COPD

**Other terms:** Triple OR ((LAMA OR Tiotropium OR Acclidinium OR Umeclidinium OR Glycopyrronium) AND (LABA OR Salmeterol OR Formoterol OR Vilanterol OR Olodaterol OR Indacaterol) AND (ICS OR Beclomethasone OR Fluticasone OR Budesonide OR Ciclesonide))

Result: 408 trials

Search strategy in **WHO International Clinical Trials Registry Platform**

(Search date: 2021/07/06)

**Keyword:** ('Chronic Obstructive Pulmonary Disease' OR COPD) AND (Triple OR ((LAMA OR Tiotropium OR Acclidinium OR Umeclidinium OR Glycopyrronium) AND (LABA OR Salmeterol OR Formoterol OR Vilanterol OR Olodaterol OR Indacaterol) AND (ICS OR Beclomethasone OR Fluticasone OR Budesonide OR Ciclesonide)))

Result: 186 trials
